# Supplementary material
Source: publisher figshare collection journal article supplement (https://asha.figshare.com/articles/dataset/_/19661130)
Supplement: Supplementary file 1 [file 1]

**Supplemental Material S1.** Odds ratios (ORs) and corresponding 95% confidence intervals (CI) from separate age-adjusted models of self-reported hearing loss stratified by sex. Estimates are weighted for the sampling design.

|                                        | Females ( <i>n</i> = 1548) | Males ( <i>n</i> = 1219) |
|----------------------------------------|----------------------------|--------------------------|
|                                        | Odds ratio [95% CI]        | Odds ratio [95% CI]      |
| Age (per +1 year) <sup>a</sup>         | 1.03 [1.02, 1.05]          | 1.05 [1.04, 1.07]        |
| Race/ethnicity                         |                            |                          |
| Non-Hispanic White                     | REF                        | REF                      |
| Non-Hispanic Black                     | 0.69 [0.45, 1.06]          | 0.49 [0.23, 1.03]        |
| Hispanic (any race)                    | 2.20 [1.04, 4.65]          | 0.73 [0.42, 1.28]        |
| Non-Hispanic other or biracial         | 1.04 [0.45, 2.38]          | 1.10 [0.44, 2.77]        |
| Income                                 |                            |                          |
| < \$32,500                             | 1.78 [0.91, 3.46]          | 1.25 [0.75, 2.10]        |
| \$32,501–55,000                        | 1.08 [0.91, 3.46]          | 1.00 [0.60, 1.65]        |
| \$55,000–85,000                        | 0.87 [0.37, 2.08]          | 1.29 [0.69, 2.41]        |
| > \$85,000                             | REF                        | REF                      |
| Education (years)                      |                            |                          |
| < 12                                   | 1.29 [0.79, 2.10]          | 1.46 [0.91, 2.36]        |
| 12–16                                  | 1.56 [1.13, 2.15]          | 1.09 [0.78, 1.54]        |
| > 16                                   | REF                        | REF                      |
| Marital Status                         |                            |                          |
| Married or living with partner         | REF                        | REF                      |
| Widowed, divorced, or separated        | 1.07 [0.73, 1.56]          | 0.68 [0.46, 1.03]        |
| Never married                          | 1.02 [0.65, 1.60]          | 0.55 [0.35, 0.87]        |
| State public health region (Wisconsin) |                            |                          |
| Southeast                              | REF                        |                          |
| South                                  | 1.25 [1.02, 1.05]          | 0.92 [0.61, 1.41]        |
| West                                   | 0.97 [0.82, 1.92]          | 1.06 [0.66, 1.69]        |
| North                                  | 1.44 [0.91, 2.29]          | 1.15 [0.66, 1.96]        |
| Northeast                              | 1.17 [0.79, 1.72]          | 1.04 [0.67, 1.60]        |
| Rural–urban community area (RUCA)      |                            |                          |
| Urban                                  | REF                        | REF                      |
| Suburban                               | 1.39 [0.93, 2.08]          | 0.85 [0.55, 1.33]        |
| Rural                                  | 1.30 [0.94, 1.80]          | 0.97 [0.69, 1.37]        |
| Occupational noise exposure            | 2.20 [1.42, 3.47]          | 2.80 [2.03, 3.88]        |
| Recreational noise exposure            | 1.70 [1.28, 2.26]          | 1.71 [1.21, 2.41]        |
| Heavy alcohol consumption              | 0.66 [0.40, 1.09]          | 1.09 [0.66, 1.80]        |
| Smoking                                |                            |                          |
| Current                                | 1.50 [0.96, 2.34]          | 1.98 [1.20, 3.27]        |
| Former                                 | 1.36 [0.93, 1.97]          | 1.37 [0.88, 2.12]        |
| Never                                  | REF                        | REF                      |
| Body mass index (kg/m <sup>2</sup> )   | 1.02 [1.00, 1.04]          | 1.00 [0.97, 1.03]        |
| History of hypertension                | 1.52 [1.02, 2.25]          | 0.92 [0.63, 1.33]        |
| Number of chronic conditions           |                            |                          |
| 0                                      | REF                        | REF                      |
| 1                                      | 1.55 [1.03, 2.35]          | 0.89 [0.58, 1.36]        |
| 2                                      | 2.23 [1.31, 3.79]          | 1.51 [0.86, 2.67]        |
| 3+                                     | 5.50 [2.80, 10.80]         | 0.57 [0.22, 1.45]        |
| Regular exercise                       | 0.74 [0.55, 1.00]          | 0.65 [0.55, 0.95]        |

|                         |                   |                   |
|-------------------------|-------------------|-------------------|
| Healthy diet score      |                   |                   |
| Poor                    | 1.52 [0.89, 2.58] | 3.21 [1.70, 6.08] |
| Intermediate            | 1.05 [0.65, 1.72] | 2.10 [2.11, 3.98] |
| Ideal                   | REF               | REF               |
| Total cholesterol score |                   |                   |
| Poor                    | 0.93 [0.53, 1.65] | 1.70 [0.81, 3.43] |
| Intermediate            | 1.38 [0.92, 2.07] | 1.61 [1.10, 2.37] |
| Ideal                   | REF               | REF               |

<sup>a</sup>*Unadjusted*
