# Supplementary material
Source: publisher figshare collection journal article supplement (https://asha.figshare.com/articles/dataset/_/19661130)
Supplement: Supplementary file 2 [file 1]

**Supplemental Material S2.** Odds ratios (*ORs*) and corresponding 95% confidence intervals (*CI*) from multivariable-adjusted models of self-reported hearing loss stratified by sex. Estimates are weighted for the sampling design.

|                                | Females             | Males               |
|--------------------------------|---------------------|---------------------|
|                                | Odds ratio [95% CI] | Odds ratio [95% CI] |
| Age (per +1 year)              | 1.04 [1.03, 1.05]   | 1.07 [1.05, 1.08]   |
| Race/ethnicity                 |                     |                     |
| Non-Hispanic White             | REF                 | REF                 |
| Non-Hispanic Black             | 0.50 [0.23, 1.06]   | 0.40 [0.12, 1.37]   |
| Hispanic (any race)            | 1.10 [0.30, 4.04]   | 0.91 [0.40, 2.05]   |
| Non-Hispanic other or biracial | 1.05 [0.40, 2.75]   | 2.29 [1.21, 4.30]   |
| Education (years)              |                     |                     |
| < 12                           | 0.64 [0.28, 1.45]   | 1.75 [0.90, 3.41]   |
| 12–16                          | 1.49 [1.06, 2.08]   | 0.96 [0.63, 1.46]   |
| > 16                           | REF                 | REF                 |
| Occupational noise exposure    | 2.06 [1.38, 3.07]   | 3.00 [2.06, 4.37]   |
| Recreational noise exposure    | 1.55 [1.06, 2.25]   | 1.67 [1.15, 2.43]   |
| Number of chronic conditions   |                     |                     |
| 0                              | REF                 | REF                 |
| 1                              | 1.38 [0.95, 2.01]   | 1.01 [0.68, 1.51]   |
| 2                              | 2.16 [1.16, 4.03]   | 2.05 [1.02, 4.13]   |
| 3+                             | 3.69 [1.71, 7.99]   | 0.47 [0.14, 1.54]   |
| Healthy diet score             |                     |                     |
| Poor                           | 1.08 [0.64, 1.82]   | 3.04 [1.78, 5.12]   |
| Intermediate                   | 0.79 [0.50, 1.24]   | 2.03 [1.10, 3.78]   |
| Ideal                          | REF                 | REF                 |
